# Supplementary material
Source: ML conference proceedings conference paper supplement (https://proceedings.mlr.press/v37/hong15.html)
Supplement: Supplementary file 1 [file hong15-supp.zip]

Archive with 2 entries (2 files):
- 1320_supp_comp.avi
- 1320_supp.pdf
